# Supplementary material for: Simultaneous Inhibition of Mcl-1 and Bcl-2 Induces Synergistic Cell Death in Hepatocellular Carcinoma
Source: MDPI journal article supplement (doi:10.3390/biomedicines11061666), 2023-06-08
Supplement: s1 [file s1]

## Supplementary Data

### Simultaneous Inhibition of Mcl-1 and Bcl-2 Induces Synergistic Cell Death in Hepatocellular Carcinoma

#### Table of Content

| Content                                                                                                                                  | Page No. |
|------------------------------------------------------------------------------------------------------------------------------------------|----------|
| Figure S1. Combination of ABT-199 and MIK665 leads to decreased mitochondrial membrane potential in Hep3B.                               | p. 2     |
| Figure S2. Combination of ABT-199 and MIK665 results in increased cytochrome c release in Hep3B cells.                                   | p. 3     |
| Figure S3. Caspase 9 activity is increased 6 h after treatment with an ABT 199 and MIK665 combination.                                   | p. 4     |
| Figure S4 Caspase 3/7 activity remains significantly enhanced after 24 h of treatment with a BH3-mimetics combination.                   | p. 5     |
| Figure S5. Caspase 8 (extrinsic apoptosis signaling pathway) is not or only to a very low extent induced by application of BH3-mimetics. | p. 6     |
| Figure S6. The combination of ABT-199 and MIK665 increases cell death in Hep3B after 24 h treatment.                                     | p. 7     |
| Figure S7. The combination of ABT-199 and MIK665 increases cell death in HepG2 after 24 h treatment.                                     | p. 8     |
| Figure S8. The combination of ABT-199 and MIK665 increases cell death in Huh7 after 24 h treatment.                                      | p. 9     |
| Table S1: Summary of flow cytometry analysis shown in Figures S6-8.                                                                      | p. 10    |
| Figure S9. The pan-caspase inhibitor zVAD inhibits cell death induction by ABT-199/MIK665.                                               | p. 11    |
| Figure S10. Combination of BH3-mimetics leads to induction of synergistic cell death in Hep3B.                                           | p. 12    |
| Figure S11. Combination of BH3-mimetics leads to induction of synergistic cell death in HepG2.                                           | p. 13    |
| Figure S12. Combination of BH3-mimetics leads to induction of synergistic cell death in Huh7.                                            | p. 14    |
| Supplementary Methods - Determination of mitochondrial membrane potential                                                                | p 15     |

## Supplementary Figures

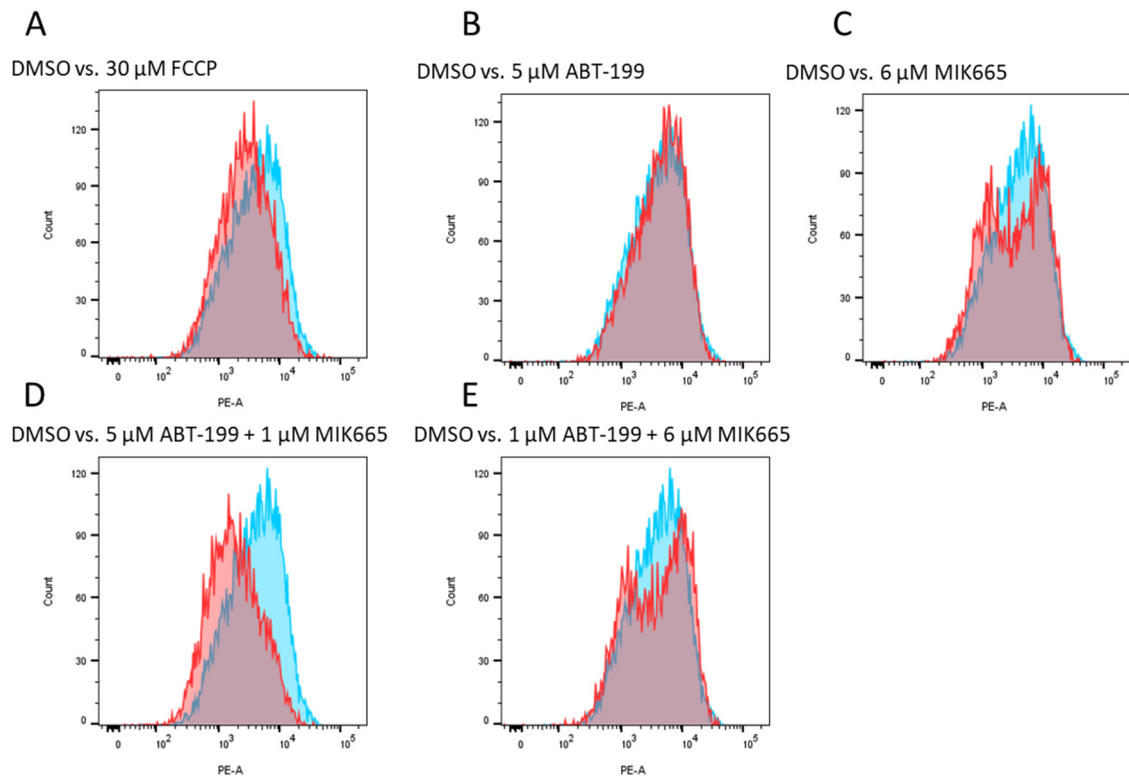

**Figure S1. Combination of ABT-199 and MIK665 leads to decreased mitochondrial membrane potential in Hep3B.** TMRE-staining of Hep3B after 8 h of treatment with BH3-mimetics. DMSO (blue), treatment (red). (A) Cells were treated with 30  $\mu$ M FCCP for 3 h to induce MOMP as positive control. (B-E) TMRE-staining of Hep3B cells. Cells were subjected to ABT-199 and MIK665 for 8 h at the indicated concentrations as single or combined treatment (n=3).

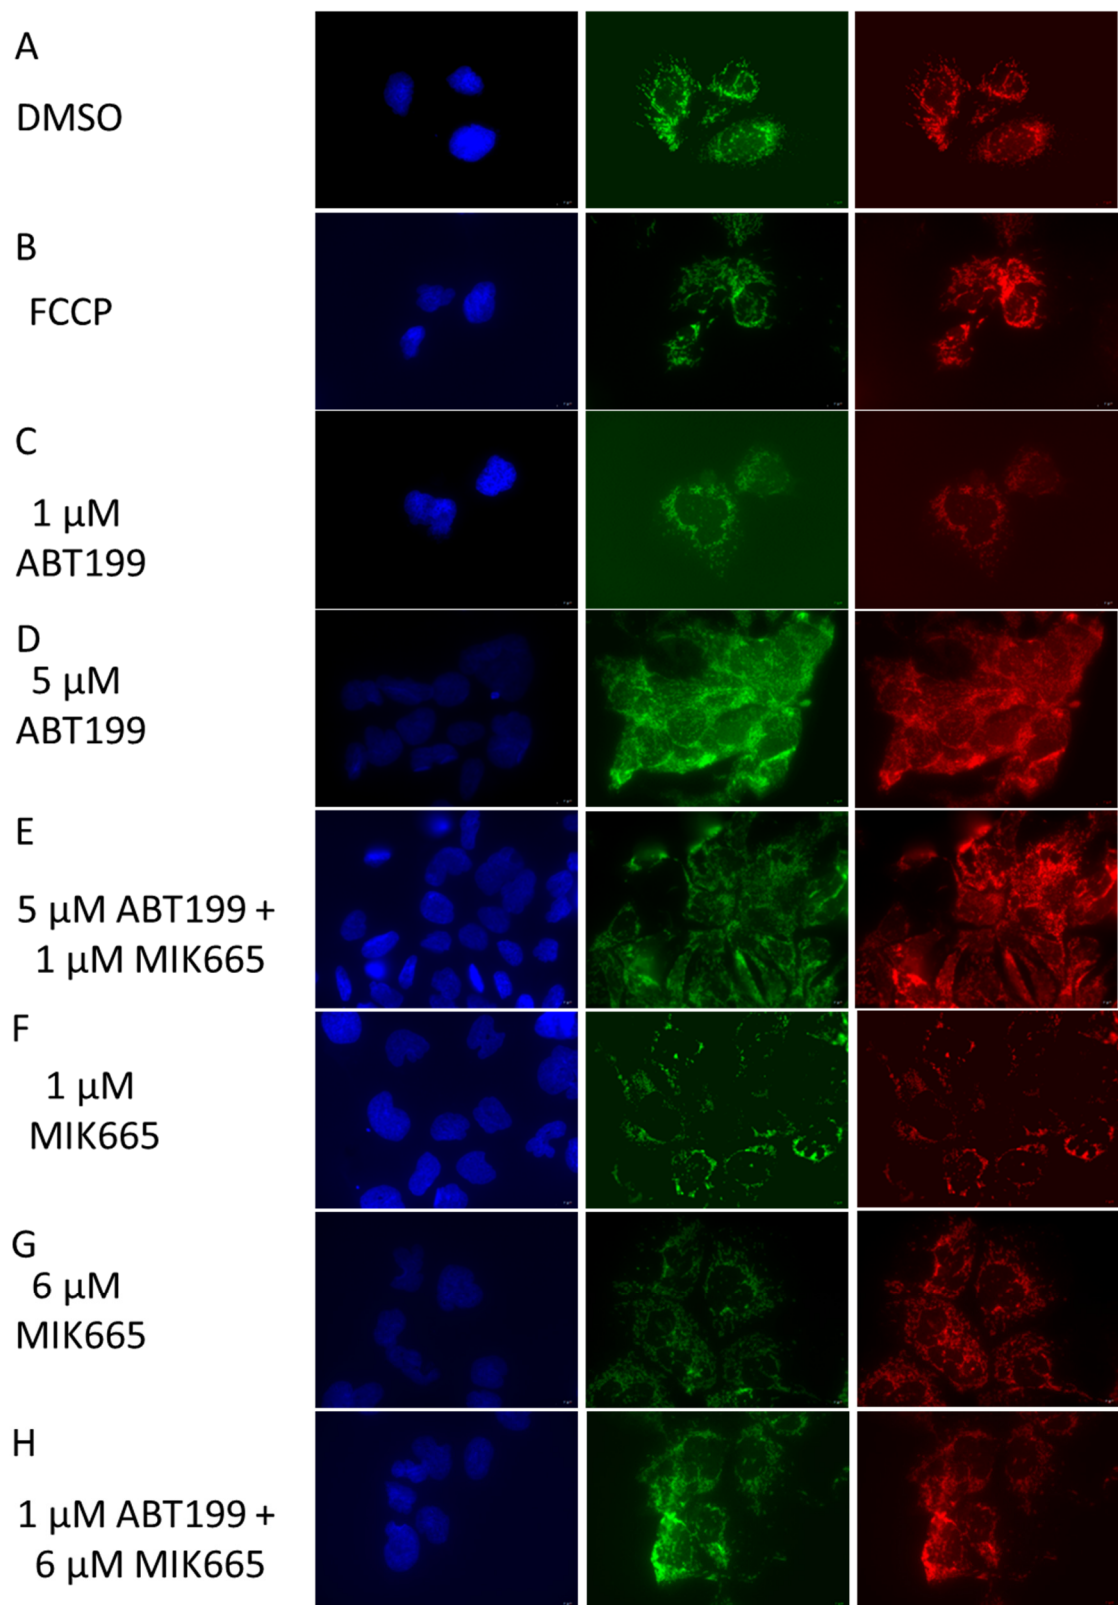

**Figure S2. Combination of ABT-199 and MIK665 results in increased cytochrome c release in Hep3B cells.** Immunofluorescence of DAPI (blue), TOMM20 (green) and cytochrome c (red). (A) DMSO treatment was used as vehicle control. (B) Cells were treated with 30  $\mu$ M FCCP for 3 h to induce cytochrome c release as positive control. (C-I) Detection of TOMM20 (mitochondrial marker) and cytochrome c in Hep3B cells. Cells were subjected to ABT-199 and MIK665 for 4 h at the indicated concentrations as single or combined treatment (n=3).

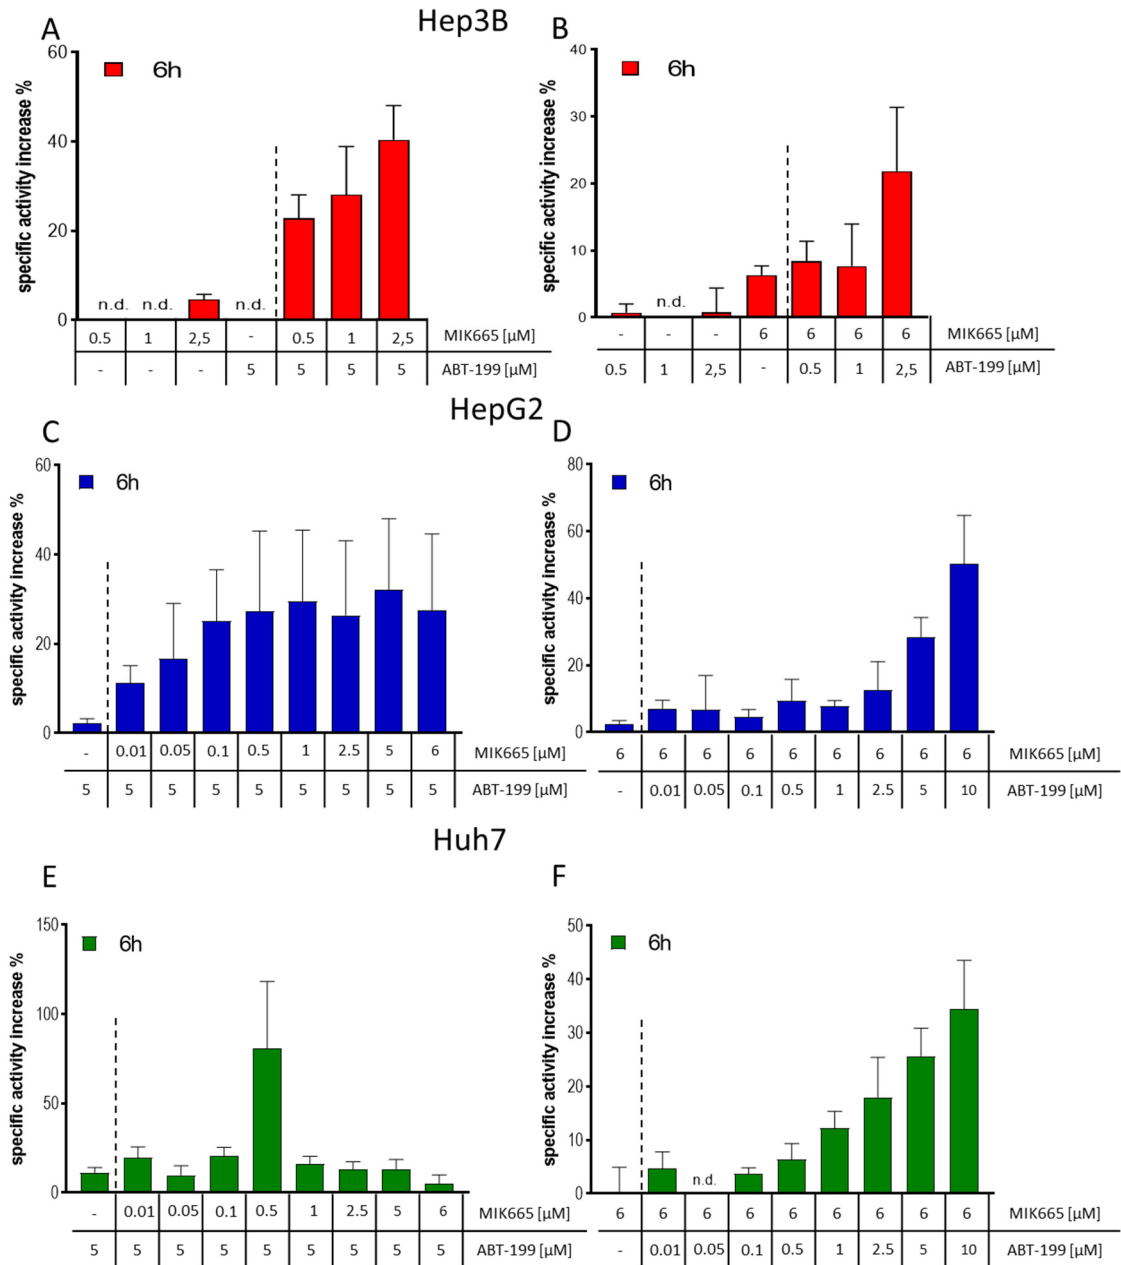

**Figure S3. Caspase 9 activity is increased 6 h after treatment with an ABT-199 and MIK665 combination.** (A, C, E) Activity assays of caspase 9 in HCC cell lines after 6 h of treatment with 5  $\mu$ M ABT-199 and increasing MIK665 concentrations. Data show a specific increase in activity compared to DMSO-treated controls (n=3, mean $\pm$ SEM). (B, D, F) Activity assays of caspase 9 in HCC cell lines after 6 h of treatment with 6  $\mu$ M MIK665 and increasing ABT-199 concentrations. Data show a specific increase in activity compared to DMSO-treated controls (n=3, mean $\pm$ SEM) (the dotted line separates the single treatment from the combination treatment with ABT-199 and MIK665).

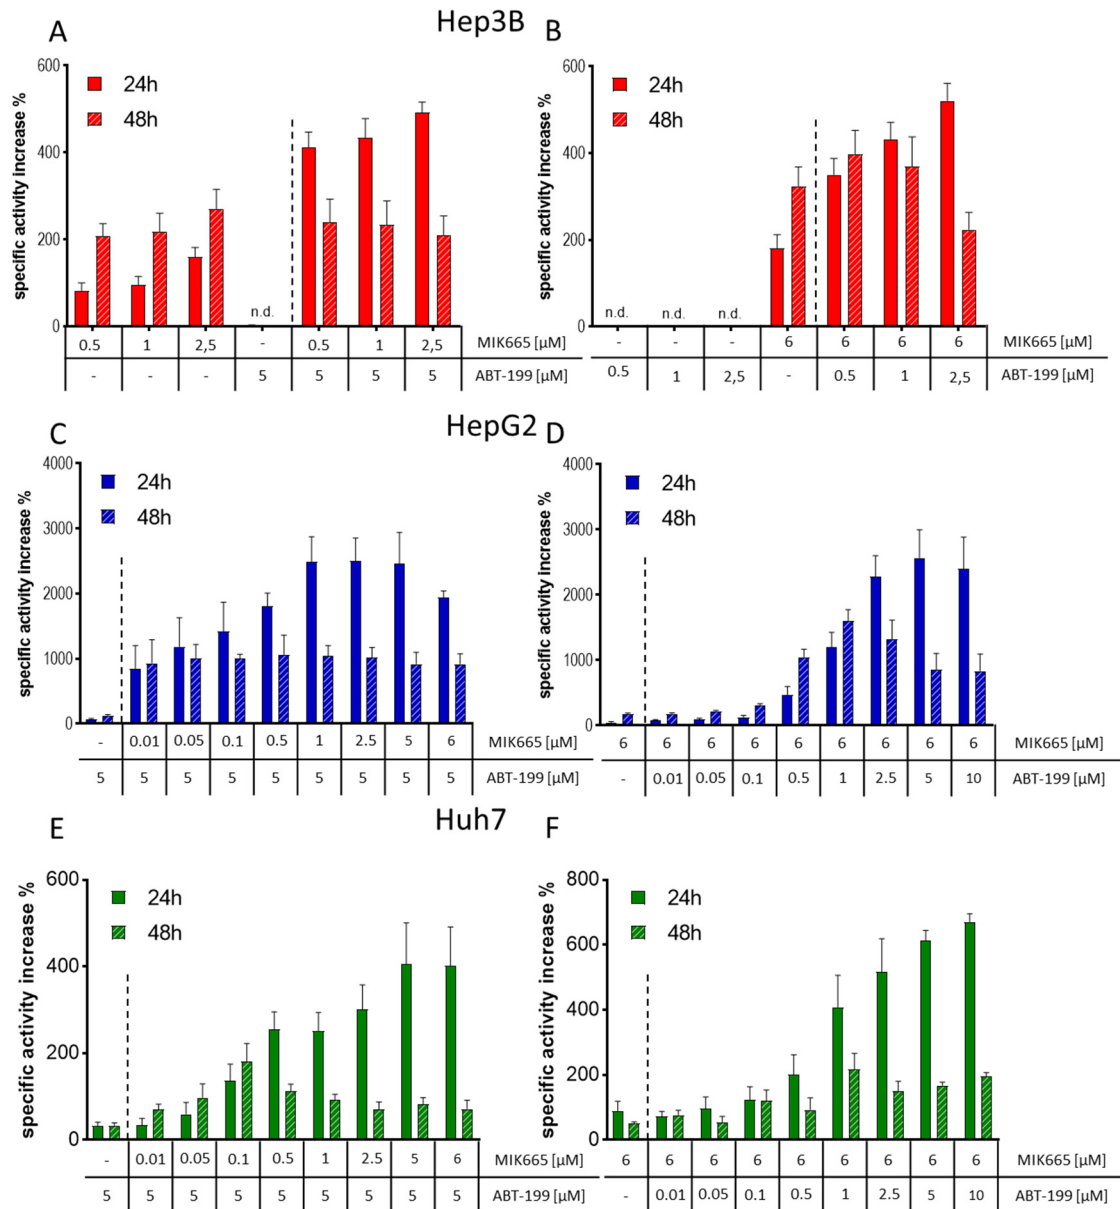

**Figure S4. Caspase 3/7 activity remains significantly enhanced after 24 h of treatment with a BH3-mimetics combination.** (A, C, E) Activity assays of caspase 3/7 in HCC cell lines after 24 h and 48 h of treatment with 5  $\mu$ M ABT-199 and increasing MIK665 concentrations. Data show a specific increase in activity compared to DMSO-treated controls ( $n=3$ , mean $\pm$ SEM). (B, D, F) Activity assays of caspase 3/7 in HCC cell lines after 24 h and 48 h of treatment with 6  $\mu$ M MIK665 and increasing ABT-199 concentrations. Data show a specific increase in activity compared to DMSO-treated controls ( $n=3$ , mean $\pm$ SEM) (the dotted line separates the single treatment from the combination treatment with ABT-199 and MIK665).

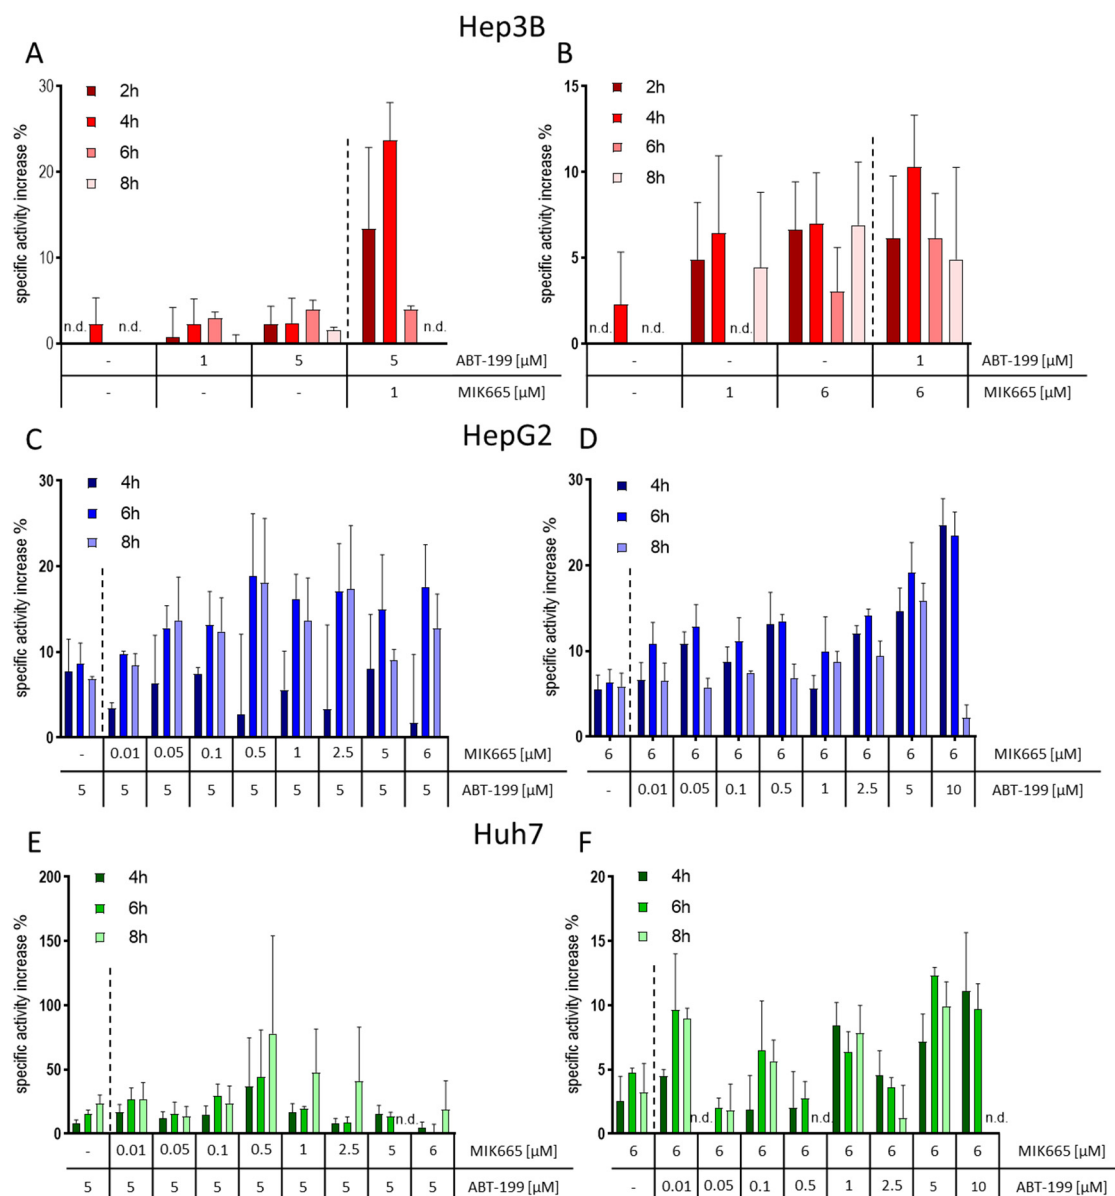

**Figure S5. Caspase 8 (extrinsic apoptosis signaling pathway) is not or only to a very low extent induced by application of BH3-mimetics. (A, C, E)** Activity assays of caspase 8 in HCC cell lines after 4 h – 8 h of treatment with 5 μM ABT-199 and increasing MIK665 concentrations. Data show a specific increase in activity compared to DMSO-treated controls (n=3, mean±SEM). **(B, D, F)** Activity assays of caspase 8 in HCC cell lines after 4 h – 8 h of treatment with 6 μM MIK665 and increasing ABT-199 concentrations. Data show a specific increase in activity compared to DMSO-treated controls (n=3, mean±SEM) (the dotted line separates the single treatment from the combination treatment with ABT-199 and MIK665).

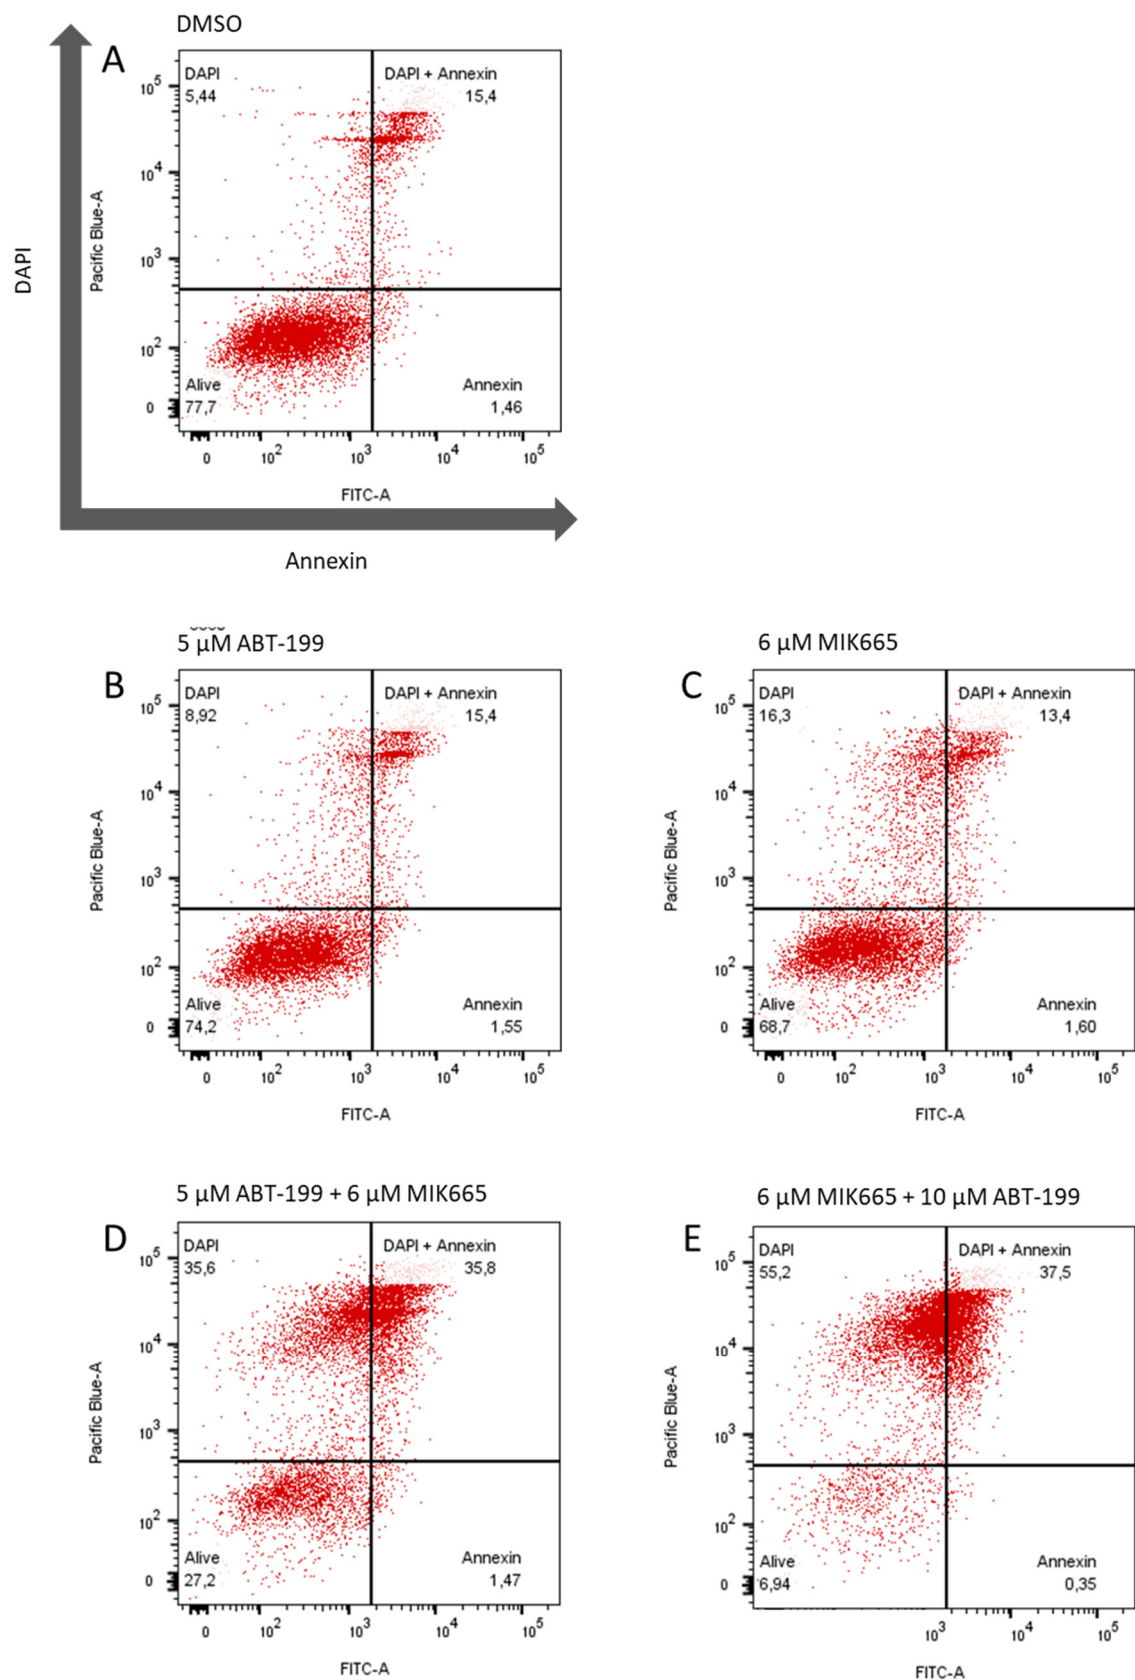

**Figure S6. The combination of ABT-199 and MIK665 increases cell death in Hep3B after 24 h treatment.** Hep3B cells were stimulated as indicated and stained with Annexin V-FITC and DAPI, and analyzed by flow cytometry. (A) DMSO treated control. (B) Treatment with 5  $\mu$ M ABT-199. (C) Treatment with 6  $\mu$ M MIK665. (D) Treatment with 5  $\mu$ M ABT-199 and 6  $\mu$ M MIK665. (E) Treatment with 6  $\mu$ M MIK665 and 10  $\mu$ M MIK665.



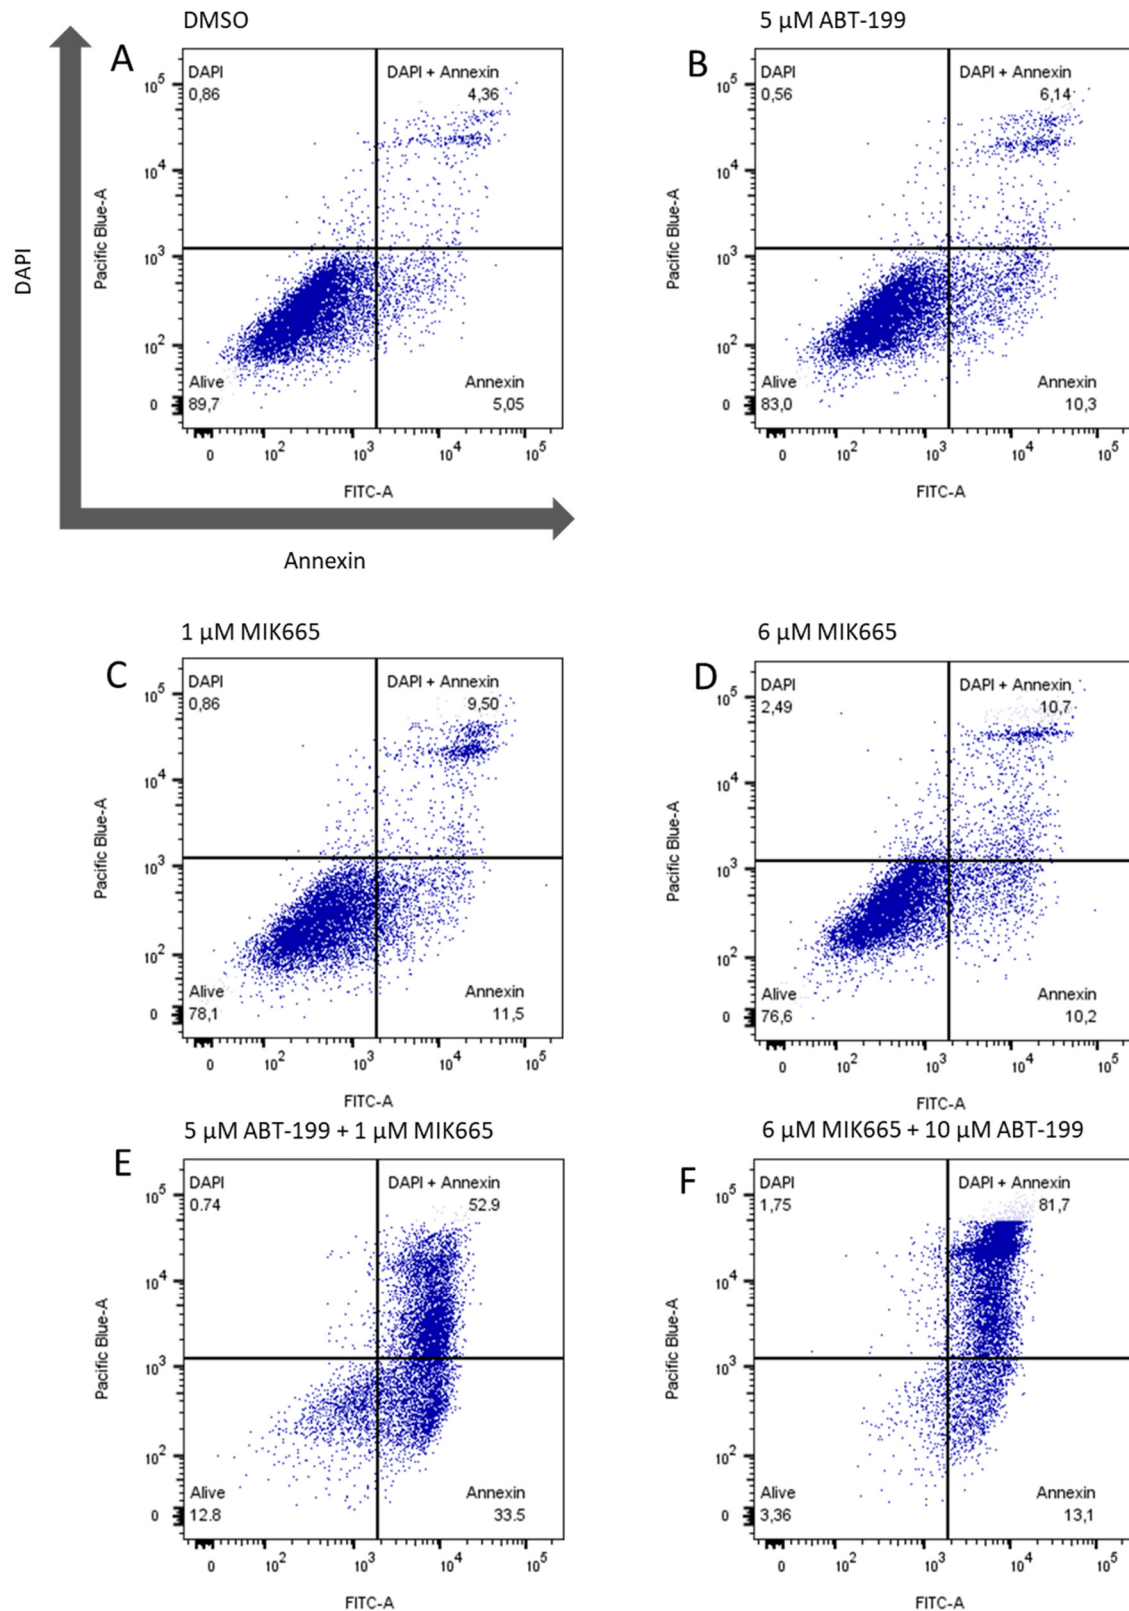

**Figure S7. The combination of ABT-199 and MIK665 increases cell death in HepG2 after 24 h treatment.** HepG2 cells were stimulated as indicated and stained with Annexin V-FITC and DAPI, and analyzed by flow cytometry. (A) DMSO treated control. (B) Treatment with 5  $\mu$ M ABT-199. (C) Treatment with 1  $\mu$ M MIK665. (D) Treatment with 6  $\mu$ M MIK665. (E) Treatment with 5  $\mu$ M ABT-199 and 1  $\mu$ M MIK665. (F) Treatment with 6  $\mu$ M MIK665 and 10  $\mu$ M MIK665.



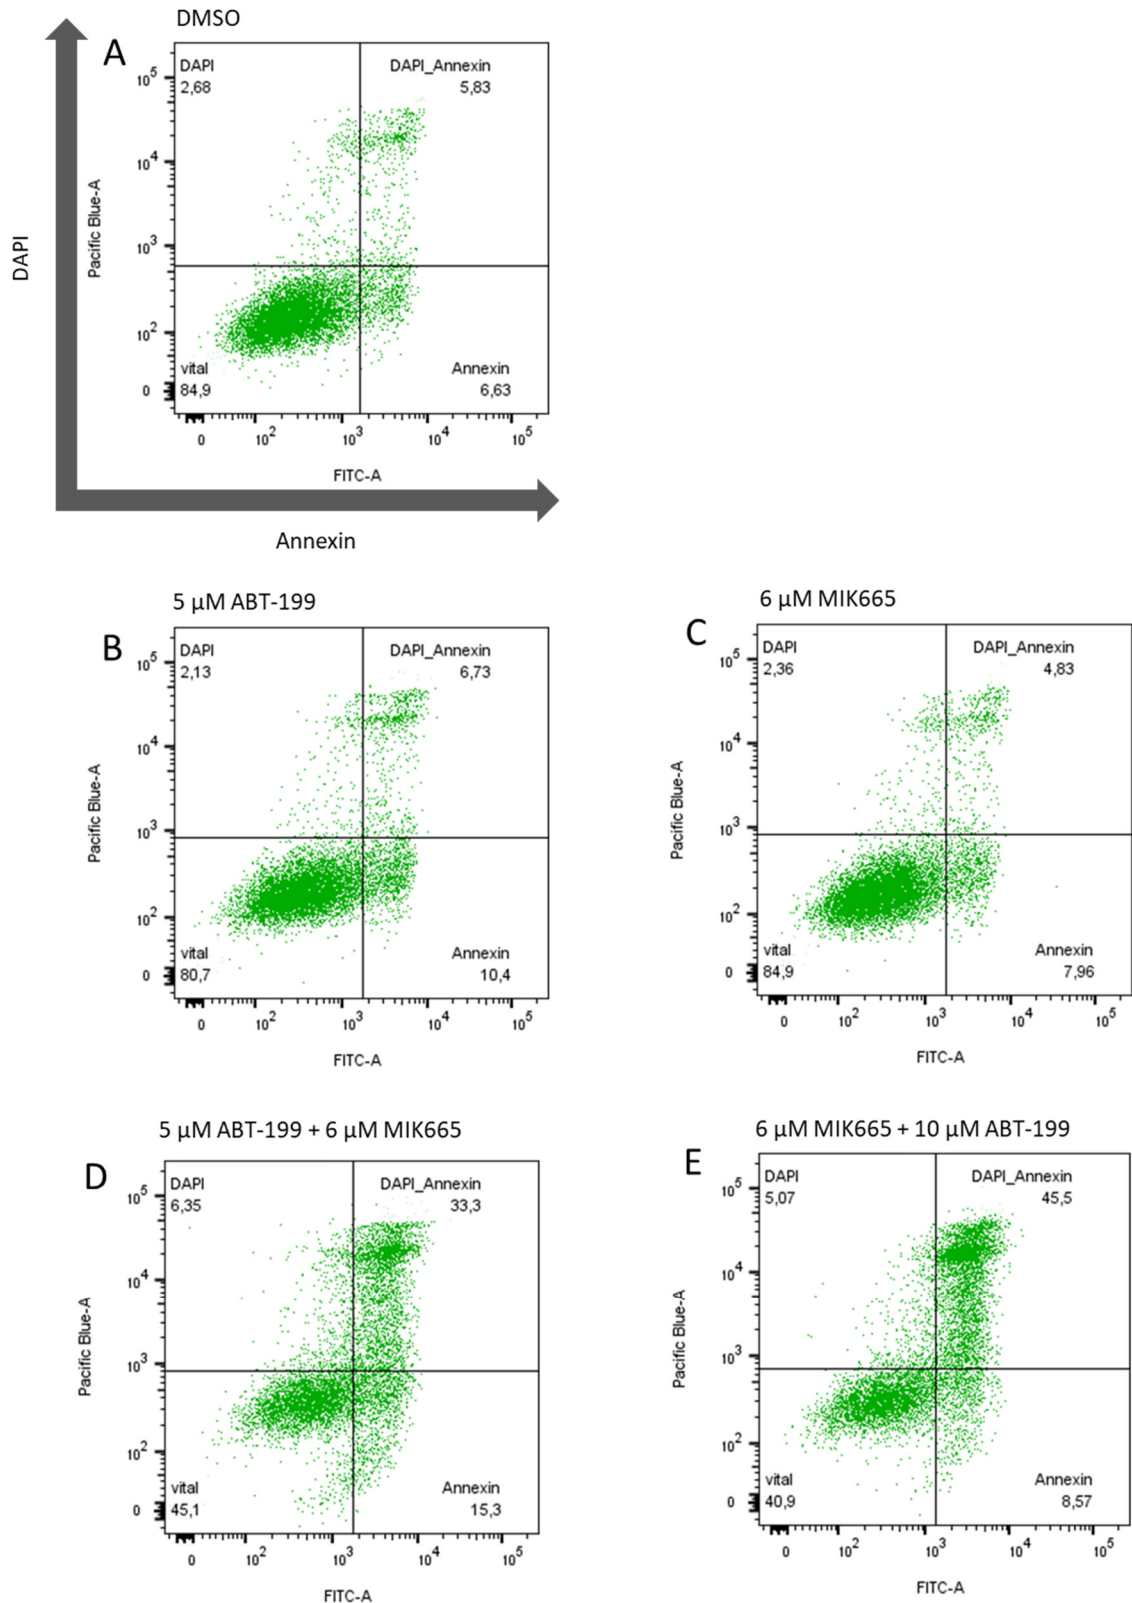

**Figure S8. The combination of ABT-199 and MIK665 increases cell death in Huh7 after 24 h treatment.** Huh7 cells were stimulated as indicated and stained with Annexin V-FITC and DAPI, and analyzed by flow cytometry. (A) DMSO treated control. (B) Treatment with 5  $\mu$ M ABT-199. (C) Treatment with 6  $\mu$ M MIK665. (D) Treatment with 5  $\mu$ M ABT-199 and 6  $\mu$ M MIK665. (E) Treatment with 6  $\mu$ M MIK665 and 10  $\mu$ M MIK665.

**Table S1:** Summary of flow cytometry analysis shown in Figures S6-8. Cells that were not positive for either Annexin V staining or DAPI (nuclear staining) were considered alive. Cells that were positive for Annexin V staining or DAPI staining and cells that were positive for both stainings were considered dead.

| Cell line    | Treatment                             | vital [%] | Dead [%] |
|--------------|---------------------------------------|-----------|----------|
| <b>Hep3B</b> | DMSO                                  | 77.7      | 22.3     |
|              | 5 $\mu$ M ABT-199                     | 74.2      | 25.87    |
|              | 6 $\mu$ M MIK665                      | 68.7      | 31.3     |
|              | 5 $\mu$ M ABT-199 + 6 $\mu$ M MIK665  | 27.2      | 72.87    |
|              | 6 $\mu$ M MIK665 + 10 $\mu$ M ABT-199 | 6.94      | 93.05    |
| <b>HepG2</b> | DMSO                                  | 89.7      | 10.27    |
|              | 5 $\mu$ M ABT-199                     | 83        | 17       |
|              | 1 $\mu$ M MIK665                      | 78.1      | 21.86    |
|              | 6 $\mu$ M MIK665                      | 76.6      | 23.39    |
|              | 5 $\mu$ M ABT-199 + 1 $\mu$ M MIK665  | 12.8      | 87.14    |
|              | 6 $\mu$ M MIK665 + 10 $\mu$ M ABT-199 | 3.36      | 96.55    |
| <b>Huh7</b>  | DMSO                                  | 84.9      | 15.14    |
|              | 5 $\mu$ M ABT-199                     | 80.7      | 19.26    |
|              | 6 $\mu$ M MIK665                      | 84.9      | 15.15    |
|              | 5 $\mu$ M ABT-199 + 6 $\mu$ M MIK665  | 45.1      | 54.95    |
|              | 6 $\mu$ M MIK665 + 10 $\mu$ M ABT-199 | 40.9      | 59.14    |

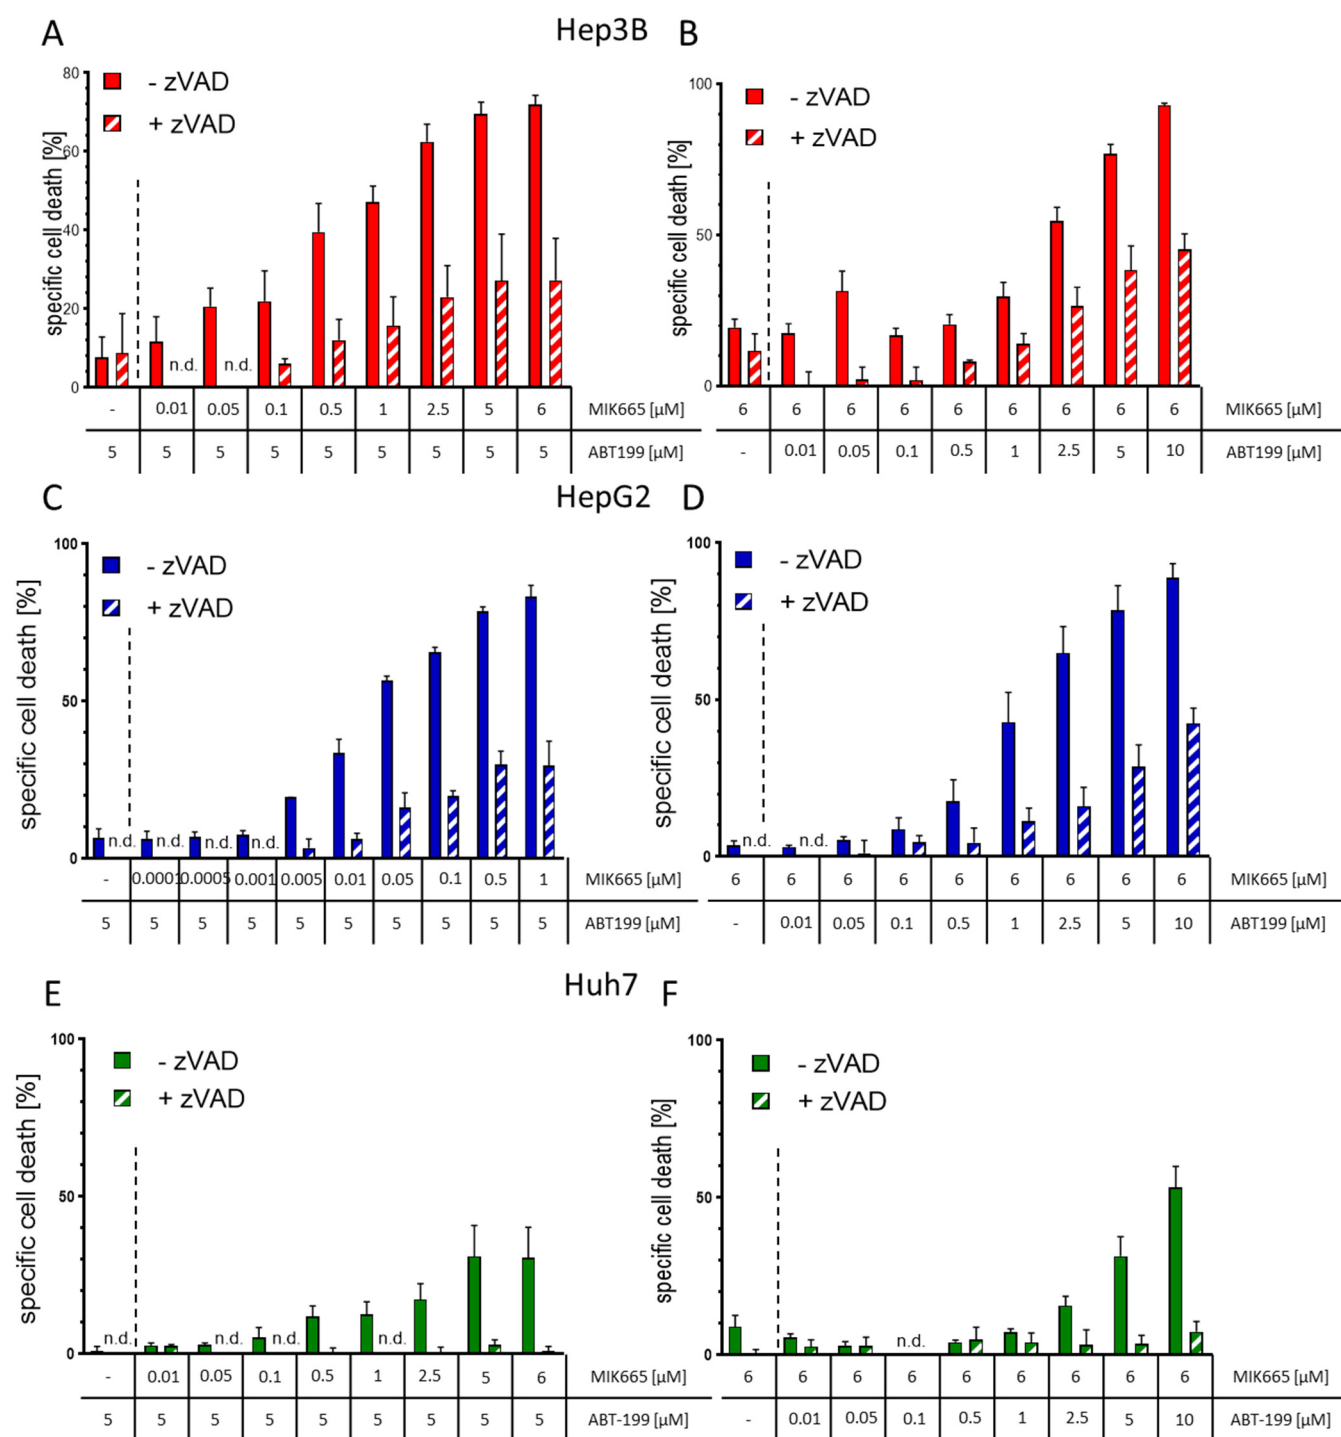

**Figure S9. The pan-caspase inhibitor zVAD inhibits cell death induction by ABT-199/MIK665.** Hep3B, HepG2 and Huh7 were pre-stimulated with 35  $\mu$ M zVAD. After 20 min, cells were treated with BH3-mimetics for 24 h. (A, C, E) Cells were treated with a steady ABT-199 concentration (5  $\mu$ M) and increasing MIK665 concentrations as indicated for 24 h (n=3, mean $\pm$ SEM). (B, D, F) Cells were treated with a constant MIK665 concentration (6  $\mu$ M) and increasing ABT-199 concentrations as indicated for 24 h (n=3, mean $\pm$ SEM) (the dotted line separates the single treatment from the combination treatment with ABT-199 and MIK665).

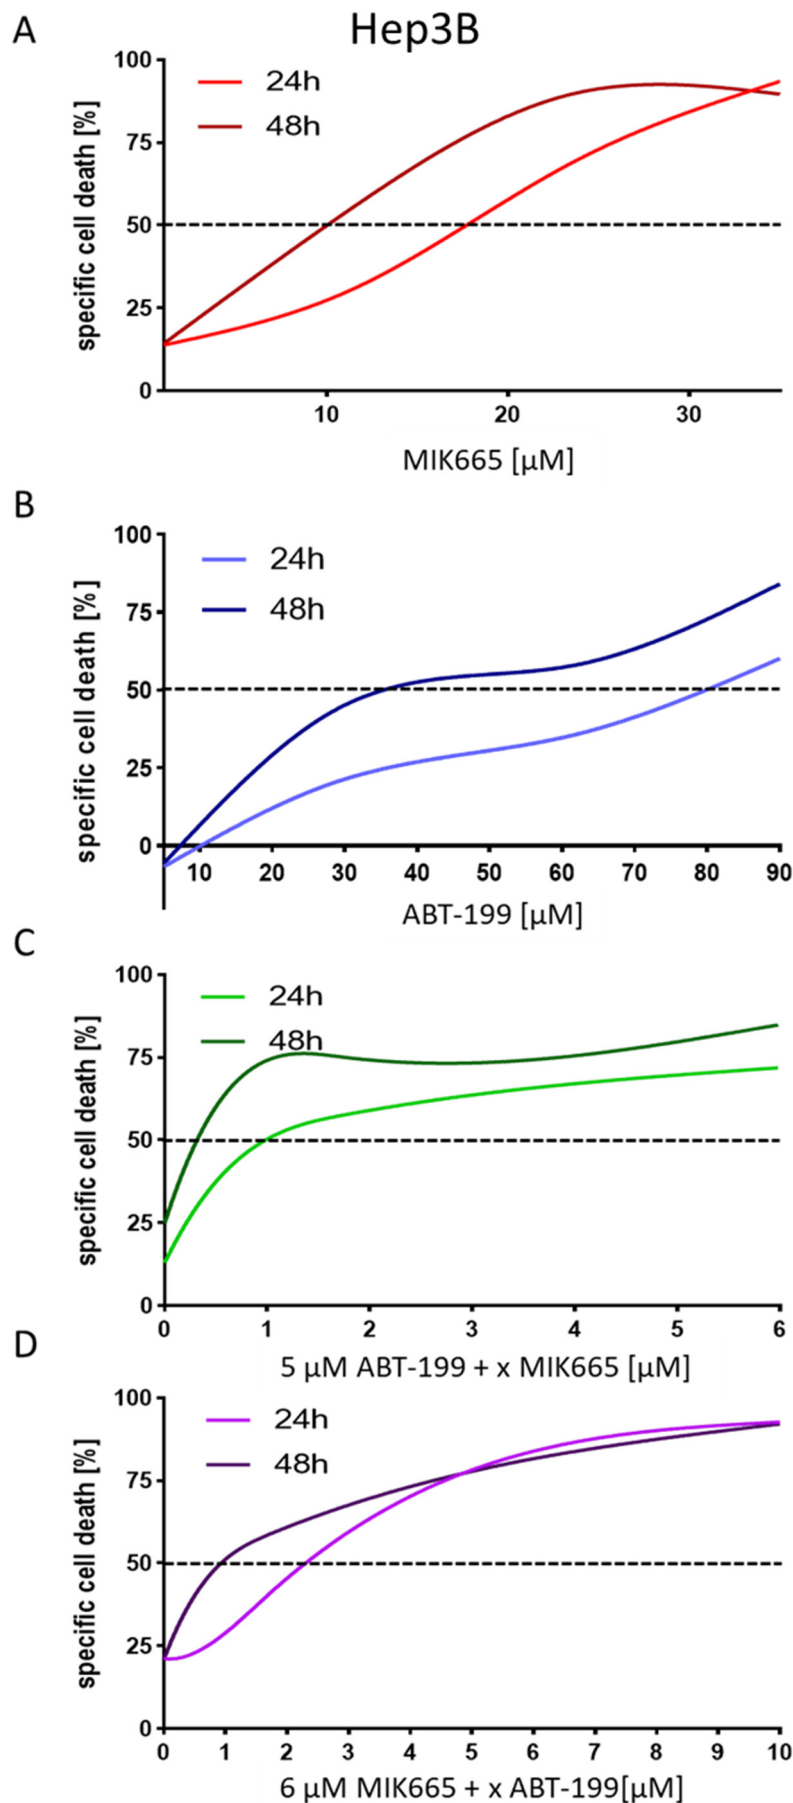

**Figure S10. Combination of BH3-mimetics leads to induction of synergistic cell death in Hep3B.** (A) Interpolation of specific cell death after 24 h and 48 h treatment with increasing MIK665 concentrations. (B) Interpolation of specific cell death after 24 h and 48 h treatment with increasing ABT-199 concentrations. (C) Interpolation of specific cell death after 24 h and 48 h treatment with 5  $\mu$ M ABT-199 and increasing MIK665 concentrations. (D) Interpolation of specific cell death after 24 h and 48 h treatment with 6  $\mu$ M MIK665 and increasing ABT-199 concentration. Calculation was executed with Graphpad Prism 8.

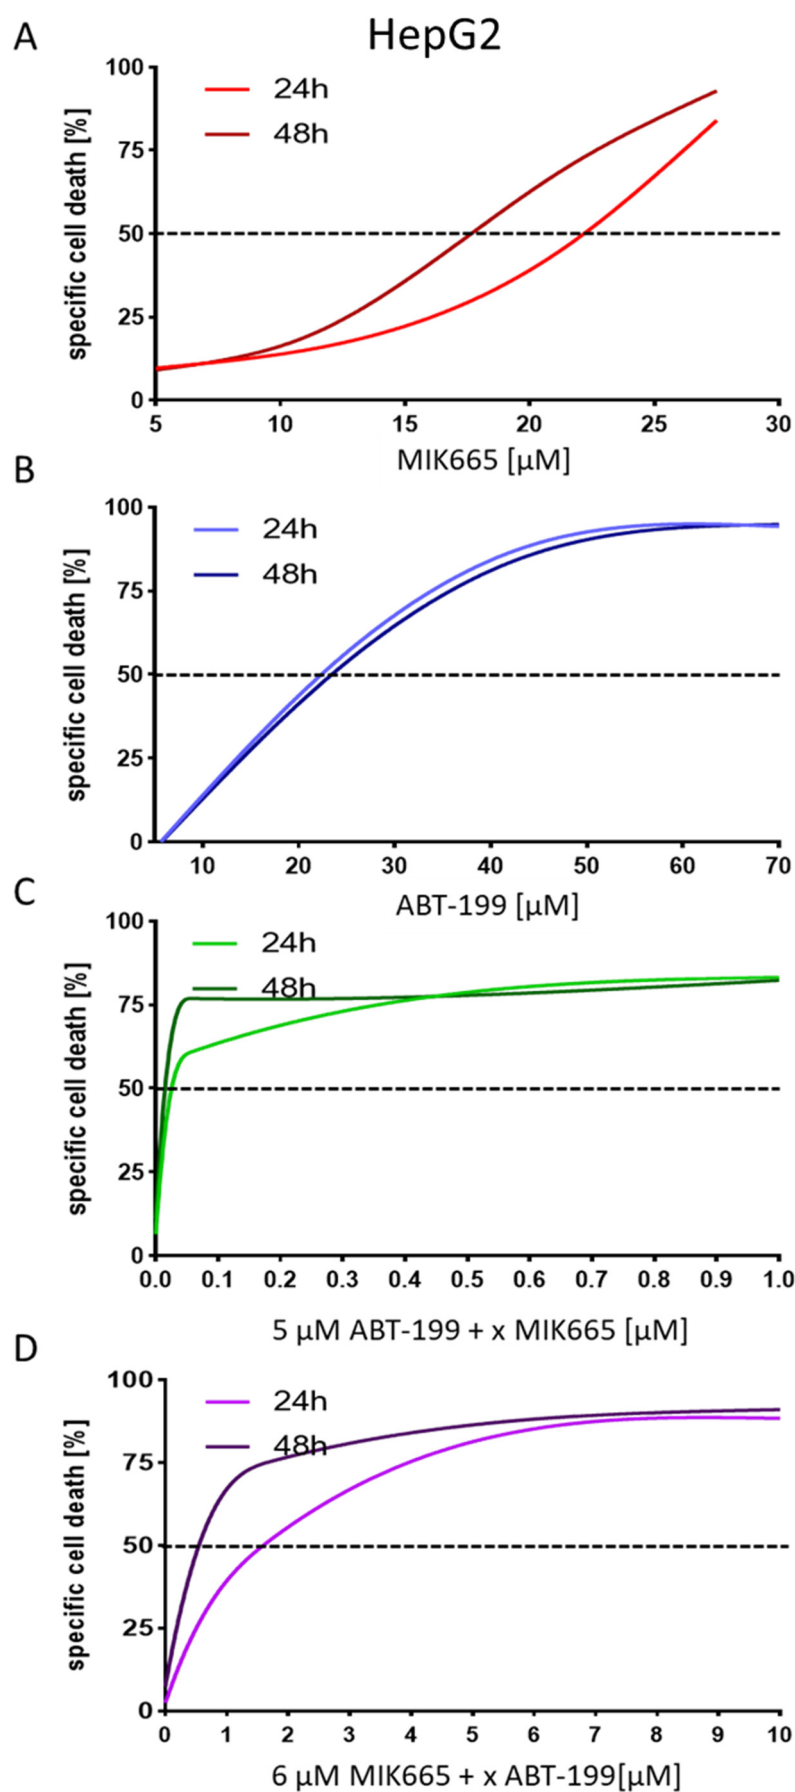

**Figure S11. Combination of BH3-mimetics leads to induction of synergistic cell death in HepG2.** (A) Interpolation of specific cell death after 24 h and 48 h treatment with increasing MIK665 concentration. (B) Interpolation of specific cell death after 24 h and 48 h treatment with increasing ABT-199 concentration. (C) Interpolation of specific cell death after 24 h and 48 h treatment with 5  $\mu$ M ABT-199 and increasing MIK665 concentration. (D) Interpolation of specific cell death after 24 h and 48 h treatment with 6  $\mu$ M MIK665 and increasing ABT-199 concentration. Calculation was executed with Graphpad Prism 8.

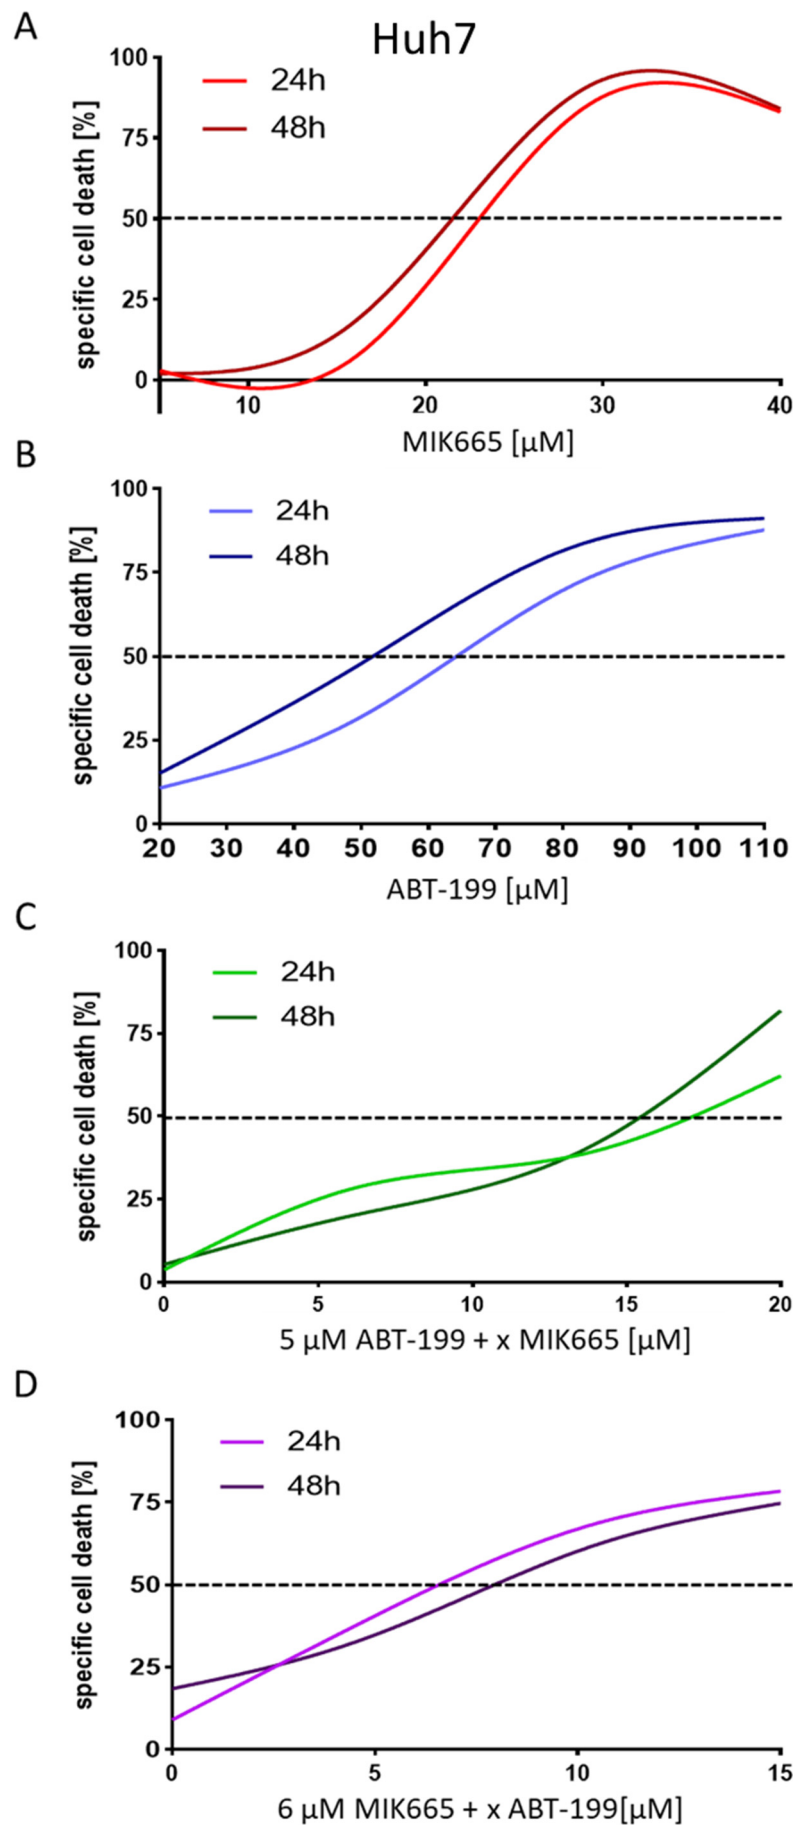

**Figure S12. Combination of BH3-mimetics leads to induction of synergistic cell death in Huh7.** (A) Interpolation of specific cell death after 24 h and 48 h treatment with increasing MIK665 concentration. (B) Interpolation of specific cell death after 24 h and 48 h treatment with increasing ABT-199 concentration. (C) Interpolation of specific cell death after 24 h and 48 h treatment with 5  $\mu$ M ABT-199 and increasing MIK665 concentration. (D) Interpolation of specific cell death after 24 h and 48 h treatment with 6  $\mu$ M MIK665 and increasing ABT-199 concentration. Calculation was executed with the Graphpad Prism 8.

## Supplementary Methods

**Determination of mitochondrial membrane potential:** To determine mitochondrial membrane potential, cells were incubated with 30  $\mu$ M Tetramethylrhodamine ethyl ester (TMRE, sigma) for 30 min. As a positive control for mitochondrial depolarization, cells were treated with 80 nM Carbonyl cyanide-p-trifluoromethoxyphenylhydrazone (FCCP) for 4 h and then membrane potential was determined.
